1 **The Healthy Nevada Project: rapid recruitment for population health**  
2 **study**

3  
4 **Joseph J Grzymalski<sup>\*1,2</sup> Max J Coppes<sup>2,3,4</sup> Jim Metcalf<sup>1,2</sup> Christos**  
5 **Galanopoulos<sup>2,3</sup> Chris Rowan<sup>2,3</sup> Michele Henderson<sup>2,3</sup> Robert Read<sup>1</sup>**  
6 **Harry Reed<sup>1</sup> Bruce Lipp<sup>1</sup> Dave Miceli<sup>1</sup>, Susan Rybarski<sup>1</sup>, Anthony**  
7 **Slonim<sup>3\*</sup>.**

- 8 1. Desert Research Institute  
9 Applied Innovation Center  
10 2215 Raggio Parkway  
11 Reno, NV 89512  
12 2. Renown Institute of Health Innovation  
13 2215 Raggio Parkway  
14 Reno, NV 89512  
15 3. Renown Health  
16 50. W Liberty St  
17 Reno, NV 89501  
18 4. University of Nevada Reno School of Medicine  
19 1664 N Virginia Street  
20 Reno, NV, 89557

21  
22 \*Corresponding authors: [joeg@dri.edu](mailto:joeg@dri.edu), [aslonim@renown.org](mailto:aslonim@renown.org)  
23  
24  
25  
26  
27

## 28 **Abstract**

### 29 **Background**

30 Nevada ranks in the bottom half of overall health rankings in the United States. The majority of  
31 residents of Northern Nevada live in Washoe County, which is confounded with high age-adjusted death  
32 rates for heart disease, cancer and chronic lower respiratory disease.

### 33 **Methods**

34 Saliva as a source of DNA was collected from adults in Northern Nevada as the first phase of a  
35 much larger (100,000 participants) effort to contribute to comprehensive population health studies in  
36 Nevada. The personal genetics company 23andMe was used to genotype the first 10,250 participants  
37 and deliver their custom ancestry, traits, wellness, and carrier status reports.

### 38 **Results**

39 The study was announced by Governor Brian Sandoval on September 15, 2016 and within two  
40 days the registration of 9,700 volunteers for an appointment was complete. Processing of 9,344  
41 participants was achieved in 3 months, with a no-show rate of just over 11%. The participant population  
42 was skewed to female and was less racially diverse than the population.

### 43 **Conclusion**

44 DNA genotyping was administered free-of-charge and the patient population was representative  
45 of the socio-economic diversity in northern Nevada – indicating that free genetic testing is of interest to  
46 a broad swath of the population and a powerful motivator for comprehensive population health study  
47 research.

48

49

## 50 **Introduction**

51 Health is the result of the complex and not fully elucidated interaction between genetic,  
52 sociodemographic and environmental factors often influenced by the availability or quality of  
53 health care [1]. Optimally, these factors need to be integrated in order to develop and apply  
54 interventions to improve the health of a population.

55

56 Depending on the data source used, Nevada ranks in the bottom half of overall health rankings  
57 in the United States. The 2016 annual report of America's Health Ranking for example, ranks  
58 Nevada #35 [2]. At the same time, healthcare spending per capita in Nevada is \$5,735, 16% below  
59 the national average, ranking the state #45 [3]. The majority of residents of Northern Nevada

60 live in Washoe County, which is confounded with high age-adjusted death rates for heart disease,  
61 cancer and chronic lower respiratory disease. These death rates exceed those in Nevada and the  
62 United States more generally (cumulative deaths in the 3 categories= 501.5 in Washoe County  
63 vs. 416.5 in Nevada vs. 385 in the United States per 100,000) [4].

64  
65 The Renown Institute for Health Innovation (IHI), a newly established public-private partnership  
66 between Renown Health (RH) and the Desert Research Institute's (DRI) Applied Innovation  
67 Center (AIC), aims to better understand those factors that contribute to poorer health outcomes  
68 in Nevada. This will be achieved by identifying and prioritizing investigations that will lead to  
69 insights allowing Nevadans to develop strategies that will improve overall health. The Healthy  
70 Nevada Project (HNP) was aimed at two goals. First, to start informing individual Nevadans of  
71 their genetic makeup such that they might make better informed decisions to modify their  
72 behaviors and improve their health. Since genetic testing as an educational tool is likely biased  
73 and restricted to those who can afford the tests (in general selecting for a more affluent  
74 population), ours were provided at no cost to participants. Second, to collect comprehensive  
75 genetic data on an extensive number of Nevadans that could be used to cross-reference with  
76 health, healthcare, social and environmental data to identify specific associations in our local  
77 communities and assist in healthcare resource planning. This will be achieved using our expertise  
78 in geomapping and understanding the effects of natural and human-induced environmental  
79 changes, and the unique computational and storage demands for data hosting, exploration, and  
80 visualization. The latter will be used to analyze aggregated electronic health record (EHR) data  
81 provided by RH.

82

## 83 **Material and Methods**

### 84 **Patient Population**

85 According to the United States Census data for 2016, the Washoe County catchment area, at the  
86 center of this phase of the study, includes 6,302 square miles and is home to more than 453,000  
87 people (population per square mile 71.9). Of these 22.2% are under the age of 18 years and were  
88 excluded from this, first, phase of the study. The study was open to all other members of the

89 community, including, the approximately 13.8% of the population that lives below the Federal  
90 Poverty Level.

91

### 92 Study Appointment Scheduling

93 23andMe has in place a well-established registration process where individuals can send their  
94 saliva from the privacy of their home. However, for the purpose of this study, which included an  
95 additional consent to merge de-identified genotype data with de-identified EHR data, an  
96 additional registration was required. It was also important to educate each participant  
97 thoroughly on the study, its implications, and potential outcomes for Nevada. For these reasons,  
98 it was decided to provide participants the opportunity to meet research staff face to face at a  
99 physical location for a study participation experience that was well choreographed. This process  
100 included a study “meet up” location, a chaperone to the study location, and a video tour of the  
101 process. These methods are detailed below.

102

103 Investigators utilized Appointment-Plus, a 3<sup>rd</sup> party HIPAA-compliant commercial appointment  
104 provider service [5]. The software allowed study coordinators to manage subject load balance  
105 and modify appointment schedules given regular no shows and cancellations.

106

107 To schedule an appointment, prospective study participants were guided to a website where they  
108 entered basic participant information, including name, birth date, and email address, and  
109 subsequently selected a one hour-long time slot to meet research staff. Typically, five, one-hour  
110 time slots were offered during each weekday, two, one-hour time slots each Saturday, and one,  
111 one-hour time slot each evening from Monday to Friday. Each time slot could include up to 30  
112 participants.

113

114 After scheduling an appointment, research coordinators validated the appointment, after which  
115 participants were sent an email through Appointment-Plus confirming their registration along  
116 with directions to the collection site. In addition, the confirmation email contained the RH-DRI  
117 Community Health Project consent document in a Portable Document Format (PDF).

118 Appointment-Plus generated a reminder for the appointment, emailed two days prior to the  
119 scheduled visit.

120

### 121 Institutional Review Board (IRB) and Consent

122 All participants were provided with 3 consents. Two consents were provided by 23andMe in  
123 electronic format, one to consent for genetic testing and sharing genotype data with the study,  
124 the other for DNA bio-banking. The latter consent is optional and does not affect the 23andMe  
125 experience or access to genotype data. The third consent form was provided by IHI and provided  
126 permission for the de-identified genetic data to be linked to de-identified EHR data from the  
127 same study subjects.

#### 128 *23andMe Consent*

129 At the appointment, participants registered with 23andMe via laptop computers available at the  
130 sampling site. During this online registration, participants provided 23andMe electronically with  
131 the required consents, similar to any other individual who chooses to have their DNA tested by  
132 23andMe. Participants approved the anonymous utilization of their SNP data and also optionally  
133 approved for the saliva to be bio banked. Both 23andMe consent forms have been approved by  
134 the Ethical and Review Services IRB. Registration with 23andMe is the point where the unique  
135 saliva collection tube number is tied to subject demographic information and an email address  
136 for 23andMe account creation and further communication.

#### 137 *IHI Consent*

138 A copy of the IHI study consent document approved by the University of Nevada Reno IRB was  
139 provided electronically to each participant when they received an electronic confirmation of their  
140 registration. This gave each participant the opportunity to study the IHI study consent form and  
141 prepare questions when they met with study coordinators. During the one-hour appointment,  
142 special effort was made to ensure that participants understood the data sharing authorization  
143 granted by signing the IHI consent, which would provide the IHI access to the 23andMe genotype  
144 data in de-identified form. At their appointment, participants signed the IHI consent form,  
145 providing the investigators a permanent record of consent. Each participant received a signed  
146 copy of the IHI consent form.

147 A total of 270 participants were provided the option to participate without a formal appointment  
148 – the majority of these people were guests on the day of the project launch and 23 were  
149 “ambassadors” pre-identified to communicate about the study to the community. These  
150 individuals received a consent form immediately prior to providing a saliva sample. However,  
151 ample time was provided for them to read and consider the content of the consent form.  
152 All participants signed the consent form with a Collaborative IRB Training Initiative (CITI) certified  
153 study coordinator available to answer questions and as witness prior to sample collection.

154

#### 155 Acquisition collection kits

156 23andMe shipped 10,000 saliva collection kits to Renown Regional Medical Center. These kits  
157 conform to accepted FDA saliva collection requirements and contain a saliva sample tube  
158 (OroGene DX OGD-500.001) with a unique identifier. Each participant is identified by an 11  
159 character mixed-case string to uniquely track study participants. There is no associated protected  
160 patient information associated with this participant identifier that is accessible to researchers.  
161 Only the IHI Principal Investigator has the link between the participant’s ID and the research data.

162

#### 163 Sampling Location

164 The sampling was performed in the Renown Regional Medical Center’s wing designated for  
165 Research and Education. Each cohort would show up at a public gathering place in the hospital.  
166 Research coordinators then checked participants in, arranged them in groups of 10, and escorted  
167 them to the study area. The study area was divided into four separate stations: education,  
168 23andMe registration & consent, saliva collection, and sample deposition followed by a final  
169 paperwork and quality assurance check by a CITI trained coordinator.

170

171 A video was produced to ensure that participants understood and followed the registration and  
172 saliva collection process. When cohort members arrived at the saliva collection site they first  
173 watched a seven-minute video with instructions for 23andMe registration, and explanation of  
174 the RH-DRI study, and saliva collection. The video ensured consistent information was provided  
175 to the participants and provided a scalable method of communication to research participants.

176 Next, participants walked to the 23andMe registration station where their test kits were waiting  
177 to be registered. There they opened the kits and registered the unique tube number with  
178 23andMe and completed the standard 23andMe online consents. From there, participants went  
179 to the saliva collection site to produce the requisite 2 ml sample. This area was partitioned for  
180 privacy. After sample collection, participants took their sealed kit to the sample deposition  
181 station where they dropped it off and had their paperwork confirmed by a CITI trained research  
182 coordinator. Finally, participants were then escorted back to the gathering area.

183

#### 184 English as a Second Language

185 Recognizing a large Hispanic community in Washoe County, a separate one-day saliva collection  
186 event was conducted in Spanish. This required that the consent forms and signage be converted  
187 to Spanish and approved by the IRB. Moreover, Spanish-speaking study coordinators were  
188 available to coordinate the sample collection/registration in Spanish. A total of 37 Hispanic  
189 research participants were recruited during this one-day event.

190

#### 191 Collection in remote areas in Nevada

192 Nevada has remote areas that are sparsely populated and underserved medically. The desire to  
193 include participants from these remote areas and to test our ability to collect at these sites, made  
194 us set up offsite saliva collection events in Winnemucca, Yerington, and Fallon. Each event was  
195 staffed with 6 study coordinators, who brought all necessary equipment (laptops, saliva  
196 collection kits, signage, pens, tape and other supplies) with them in a van.

197

#### 198 Cost to participants

199 Through a generous donation of the Renown Health Foundation, we were able to offer the DNA  
200 testing for free to all participants. The Governor's Office of Economic Development through a  
201 Knowledge Fund grant to the DRI AIC helped fund data scientists.

202

#### 203 Staffing

204 Support for study execution depended on numerous staff from RH and from DRI. At RH nine FTEs  
205 were utilized for research coordination; at DRI four FTEs were utilized to ensure patients could  
206 concurrently register for 23andMe and the IHI study. DRI also spearheaded utilization of the  
207 appointment system and creation of the two web-based applications for the registration process.

208

#### 209 EHR data

210 Starting in June 2016, de-identified EHR data spanning more than 10 consecutive years of >1.4  
211 million patients encompassing >26 million provider encounters were transferred to AIC's Health  
212 Insurance Portability and Accountability Act (HIPAA) secure analysis and storage environment.  
213 Since then, EHR data are updated quarterly.

214

#### 215 Matching

216 In order to link subject EHR data to SNP data the participant 23andMe ID was mapped to a  
217 participant's email address, name and date of birth and then de-identified.

218

#### 219 Cardiac Risk Score Calculation.

220 In order to demonstrate the power of IHI's data, we tested, to demonstrate proof of principle,  
221 our ability to replicate a recent study of genetic risk scoring for coronary artery disease using SNP  
222 data [6]. Variant calls from the Human Omniexpress-24 array were provided by 23andMe as VCF  
223 files. The data were imputed and phased using the Michigan Imputation Server and Eagle v2.3  
224 [7,8]. The reference panel was HapMap2. Reference SNP cluster IDs (rsIDs) were associated with  
225 genomic coordinates using SNPTracker [9]. For cardiac risk score calculation, a total of fifty SNPs  
226 were examined based on reported findings [6]. Forty-eight of the 50 rsIDs were in our dataset;  
227 31 were genotyped and 17 were imputed. A cardiac risk score was then assessed based on the  
228 odds ratio of each SNP, as previously reported [6]. The natural log of the published odds ratio at  
229 each SNP was multiplied by the number of risk alleles for each de-identified participant. A final  
230 sum was then calculated across all variants. Data were then visualized using a histogram with a  
231 bin width of 0.05.

232



## 233 **Results**

### 234 **Participation and no-show rate**

235 Restricting recruitment to Northern Nevada participants in this phase of our study was primarily  
236 guided by geographic convenience with an estimated local population of about 450,000 people  
237 in Washoe County. Although the study and announcement by the Governor was covered in local  
238 news and press the appointment process was through the Renown Health website. In this early  
239 stage, we wanted to demonstrate our ability to develop an infrastructure that would allow for  
240 the successful collection of saliva samples from thousands of people in a short time period. Not  
241 only were we able to successfully collect saliva from participants in Washoe county, but we also  
242 developed an effective ‘mobile sample collection’ mechanism, to obtain DNA from people living  
243 in communities in rural Nevada.

244  
245 We were surprised at the incredible speed with which participants signed on. The study was  
246 announced by Governor Brian Sandoval on September 15, 2016 and within two days the  
247 registration of 9,700 volunteers for an appointment was complete. Three hundred volunteer slots  
248 were reserved for special events. Moreover, ongoing interest for participation was evidenced by  
249 a waiting list of more than 4,000 participants. The no-show rate was just over 11% (1,210 of  
250 10,554 online appointments made) and was mitigated by pulling people from a waitlist.

251  
252 Formal appointments began on September 28, 2016 and were completed on December 21, 2016.  
253 Within that time frame there were 69 days of appointments, 17 days off and 9,344 appointments  
254 were completed.

### 255 256 **Planning and success**

257 Considerable effort went into planning the public launch. Critical to garnering high-level support  
258 in all three organizations was ensuring the Governor of Nevada was interested in participating.  
259 The Governor readily agreed to be the first participant in the study on launch day. Dignitaries,  
260 board members and employees of both RH and DRI were invited to attend the launch along with  
261 members of the press. Additionally, 23 ambassadors were selected from the community to

262 highlight the study. These emissaries were carefully chosen for their visibility in our communities,  
263 ranging from a Native American with a high-level position in their tribe, to a radio disc jockey who  
264 talked about the study on his radio show.

265

#### 266 Registration and email address

267 Using a personal email address was a crucial component to the study. First, 23andMe uses the  
268 email address as the only mechanism to communicate results with its consumers. When  
269 individuals, often a spouse, attempted to utilize a shared email address, the 23andMe  
270 registration process, structured to disallow sharing email addresses, would issue a warning “This  
271 email is already in use”. Second, the IHI uses the email address provided to identify participants.  
272 Occasionally, participants would have used an email to register with 23andMe and a different  
273 one when making the appointment for saliva collection. These differences were reconciled so  
274 that one email address was used in association with one individual.

275

#### 276 Results from 23andMe

277 Within approximately eight weeks after donating a saliva sample, each subject received results  
278 from 23andMe’s Personal Genome Service, including more than 60 personalized genetic reports  
279 that detail their carrier status, genetic mutations which can be passed onto children, for inherited  
280 genetic conditions, as well as their traits and ancestry. Earlier this year, the FDA approved  
281 23andMe to provide participants information on their risks to get certain conditions like  
282 Parkinson and Late-onset Alzheimer disease. In doing so, 23andMe is the only company with FDA  
283 approval to provide genetic health risk reports without prescription. The new information is  
284 being made available to participants through 23andMe. Combining genetic research for which  
285 results are not immediately available with ‘immediate gratification’ through the 23andMe  
286 Personal Genome Service was appreciated by many participants. In fact, we suspect that many  
287 participants were swayed to partake because the availability of immediate genetic results, a  
288 hypothesis that we intend to test.

289

#### 290 Epidemiology (description of basic demographic data)

291 *Race/ethnicity*

292 The racial and Hispanic origin of the broad study region defined as Northern Nevada is compared  
293 to Washoe County, the rest of Nevada and the USA in Table 1. Northern Nevada (population  
294 713,413) is comprised of 11 counties: Carson City, Churchill, Douglas, Elko, Eureka, Humboldt,  
295 Lander, Lyon, Pershing, Storey, and Washoe. The majority of residents live in Washoe County  
296 (population 453,000). Almost 80% of Northern Nevadans are White and 20% self identify as  
297 Hispanic or Latino. Table 2 shows that the study cohort is less diverse than the reported race and  
298 ethnicity distribution in Washoe County.

299

300 *Residence*

301 The residence of the study participants is reported in Supplemental Table 1. In Northern Nevada,  
302 RH is the only tertiary care facility between Sacramento, California and Salt Lake City, Utah,  
303 attracting patient referrals from surrounding counties. In addition, the Sierra Mountains and Lake  
304 Tahoe are vacation destinations that attract a significant number of visitors. This explains the  
305 discrepancies noted in Supplemental Table 1: roughly one-third of the RH patient population is  
306 from outside of Northern Nevada, while over 98% of study participants are from Northern  
307 Nevada. Moreover, for this initial part of the study, the majority of consents were performed at  
308 the Renown Regional Medical Center in Reno, NV, self-selecting people living close to the  
309 hospital. However, the three rural recruitment events in Fallon, Winnemucca, and Yerington,  
310 were highly successful and demonstrated our ability to use a 'mobile sample collection' system  
311 to obtain saliva for this study from people living in rural Nevada. A total of 501 participants were  
312 recruited from these off-site locations (Fallon 160, Winnemucca 168, and Yerington 173). In  
313 addition, 551 people from rural Northern Nevada travelled to our central collection center in  
314 Reno, resulting in 1,052 participants from outside Washoe County.

315

316 *Age*

317 Age distribution for USA, Nevada, Northern Nevada, and Washoe County are provided in  
318 Supplemental Table 2[10]. Of interest the lower % of people under 30 years of age in Northern

319 Nevada as a whole compared to Nevada and the United States (39% versus 41 % and 42%  
320 respectively). Washoe County has 42% of people in this age group.

321 When comparing the age distribution between the Healthy Nevada Project (HNP) participants  
322 and the RH EHR patient population we noted several differences (Supplemental Table 3). The  
323 HNP participants age distribution is skewed to older participants because individuals 18 years  
324 and younger were specifically excluded for this first phase of the study. Second, HNP participants  
325 between the ages of 31 and 70 years were over-represented in this cohort, while those over the  
326 age of 70 were underrepresented.

327

### 328 *Income/poverty level*

329 The Reno/Sparks urban area has 5 zip codes with greater socio-economic disparity than the rest  
330 of Washoe County [4]. Approximately 30% of the population live in these 5 zip codes but  
331 represent 42% of the hospital inpatient visits and 54% of the emergency room visits.  
332 Supplemental Table 4 demonstrates that the inclusion criteria and our ability to offer the test for  
333 free, allowed us to include people from various economic backgrounds. The percentage of  
334 participants considered to live below the poverty level did not select only for participants who  
335 could afford personal genetic testing. The participant population comprised of approximately  
336 30% who live in the most impoverished Zip Codes of Washoe County indicating no cost  
337 participation does provide economic diversity to the cohort.

338

### 339 *Gender*

340 The EHR data population was well balanced in terms of gender reflecting the gender balance in  
341 the overall population. The HNP population consisted of many more females (65%) than males  
342 (35%)(Supplemental Table 5).

343

### 344 Sample issues

345 On occasion, there were sample issues – not enough DNA from saliva or other methodological  
346 issues – that caused a sample exception in the 23andMe processing pipeline. These were  
347 communicated to participants and a new kit was sent to their address of choice. We encountered

348 21 sample exceptions in our study. The largest problem encountered with the delivery of results  
349 to participants was forgotten passwords or other issues accessing established 23andMe  
350 accounts. Participants would call the study coordinator number and be directed to 23andMe  
351 customer service for privacy purposes (emails and passwords were involved) while an IHI  
352 research coordinator followed up to ensure the participant was satisfied with the resolution. Five  
353 people dropped out of the study because of dissatisfaction with the experience or concerns with  
354 privacy.

355

### 356 Electronic Healthcare Records (EHR)

357 Participants consented to have their EHR history at RH, if available, merged with their genetic  
358 data in order to study outcomes – this matching was done and then de-identified. Since this  
359 genetic study was not restricted to just RH patients, 8180 participants were EHR matched, while  
360 the remaining 1520 participants had no EHR data or were unable to be matched.

361

### 362 Cardiac Risk Scores

363 Cardiac risk scores were quantified from the SNP data provided by the direct to consumer genetic  
364 testing company, 23andMe [6]. The mean risk score of our cohort (3.57) was consistent with  
365 other studies (Figure 2). The lowest quartile was 3.208 and upper quartile was 3.918.

366

### 367 Discussion

368 The ultimate goal of the Healthy Nevada Project is to recruit 100,000 study participants,  
369 representative of Nevada's population to improve the health of the population through  
370 identification of susceptibility for disease, early detection, precision treatment approaches and  
371 care delivery research, among many possibilities. This will allow us to link detailed health and  
372 healthcare information with comprehensive environmental data and extensive genetic  
373 information. Here we report on the first phase of DNA sample recruitment, the acquisition of  
374 DNA samples from 9,700 individuals in Northern Nevada, and the proof of principle that our  
375 approach can generate the desired data to influence health in our communities.

376

377 The enrollment was completed in two days and the consenting and saliva collection was  
378 completed in 69 working days. We suggest that the remarkable success can be attributed to a  
379 carefully organized marketing campaign and an extremely successful public launch. Prior to the  
380 launch, with the input of a local advertising agency, the study was widely advertised ranging from  
381 creating a web presence to billboards in the community. Throughout the campaign special  
382 attention was given to ensuring consistent messaging. The following factors also contributed to  
383 the success of the study. First, garnering sufficient organizational support to conduct the study.  
384 This applies in particular to RH that had to make space and personnel available for scheduling  
385 sample collections, hosting, informing, and consenting participants, and for collecting and  
386 processing the samples. Second, the generous financial support of the Renown Health  
387 Foundation was of critical importance since it removed financial barriers to participation. Third,  
388 ensuring awareness that the study was taking place in the community and was intended to  
389 address a community problem. This involved RH, the DRI, the Governor's office, and 23andMe.  
390 As part of driving home the marketing message, 270 launch attendees were given 23andMe saliva  
391 collection kits to begin the study after completing the consent process onsite -- these included  
392 23 ambassadors who were instrumental in helping publicize and share through their networks  
393 the potential benefits of participating. Finally, utilizing 23andMe's well-established processes  
394 and infrastructure to facilitate sample and data collection, as well as subsequent DNA extraction  
395 and processing was a key element of the study. Partnering with 23andMe, who has  
396 commoditized the process, allowed for quick, efficient, and quality sample collection and  
397 processing.

398

### 399 Privacy

400 While potential privacy concerns related to access of the combined (health, healthcare, genetic,  
401 social, and environmental) data were clearly dealt with in the consent forms provided, a small  
402 number of participants remained concerned with privacy issues associated with the study.  
403 Specifically, some participants asked research coordinators if they were required to use their real  
404 names, email addresses and birthdates. Incorrect email addresses make account creation with  
405 23andMe impossible while incorrect names and/or birthdates would make matching participants

406 to EHR data impossible. We also noted that less than 10 potential participants, who indicated to  
407 have intensively examined the privacy statement on the 23andMe website, opted out at the time  
408 of saliva collection. Finally, we have a few participants specifically inquiring whether IHI would  
409 share their DNA data with insurance companies. The IHI IRB document expressly states that only  
410 DRI will have access to both de-identified DNA and EHR. Consequently, no identifiable genetic  
411 data will ever be available to RH, its employees, or any other organization, including insurance  
412 companies. This firewall between the hospital system and the research was considered essential  
413 to the study. The only way to link the SNP data to EHR record data would be after obtaining  
414 specific consent from participants for future studies that would have to be reviewed and  
415 approved by an IRB.

416

#### 417 Biases in our convenience sample

418 There are obvious biases in convenience sampling [11]. The RH population is noticeably on  
419 average older; older people use hospital care more frequently than younger (explaining the  
420 higher percentages in the EHR data group), while younger people are generally more mobile and  
421 able to travel to the study site (explaining the higher percentages in the HNP population). When  
422 expanding the IHI study to 100,000 participants special attention will need to be made to recruit  
423 more aged individuals to have an accurate reflection of the population.

424

425 There are noted sex based biases in volunteer behavioral research [12]. As well, a large majority  
426 of the appointments were during the day and it could be that the older population had higher  
427 male:female workforce participation. Since during this first phase of the study there had been no  
428 attempt to balance the male:female ratio, we have identified a need to gain that balance going  
429 forward, when the study expands and will purposefully focus on a large cohort representative of  
430 the general Nevada population [13,14].

431

432 Though NV is not as ethnically diverse as other states our study population was skewed toward  
433 whites and under-represented the Hispanic population. Better bi-lingual advertising and direct  
434 communication with the Latino community will be necessary for the future study expansion.

435

436 Using consumer genetics in a population health study

437 Genotype data collected from consumer platforms coupled with self-reported phenotype  
438 information have great potential [15]. However, how these data are communicated and  
439 implemented in a healthcare setting is still a challenge. We are in the early stages of developing  
440 responsible methods to integrate these metrics into more traditional risk factors such as the  
441 American Heart Association healthy lifestyle factors of no current smoking, BMI<30, at minimum  
442 weekly physical activity and healthy diet [16]. Yet, it is remarkable that for minimum cost (in  
443 healthcare perspectives) we can genotype at population scale and gain important insights into  
444 our community genetic health risk.

445

446 Lessons learned

447 Part of the process was making a video available to each participant that walked him or her  
448 through the process and expectations (<https://www.youtube.com/watch?v=rWzla8NNhlw>).  
449 Given the feedback we received, we should have included subtitles for those hard of hearing. In  
450 addition, we have decided to develop a video with Spanish subtitles, for obvious reasons. We  
451 also believe that the consent form can be further improved. Inability to access results or  
452 confusion about the creation of a 23andMe account should be covered in the consent. The  
453 cardboard boxes that the kits arrive in are superfluous waste when utilizing almost 10,000 in less  
454 than 3 months. They should be eliminated. Future sampling events will have to address the  
455 incongruity between the diversity of the extant population and those who choose to participate  
456 if we are to serve the health needs of all members of our communities.

457

458 **Conclusion**

459 A preliminary pilot population health study was initiated and the first phase was to collect saliva  
460 and genotype from approximately 10,000 northern Nevadans. This was completed in a  
461 catchment area surrounding Reno, NV where a single tertiary care facility treats ~70% of the  
462 patient population. The participant population was skewed to female and was less racially diverse  
463 than the population. The genetic test was administered free-of-charge and the patient



464 population was representative of the socio-economic diversity in northern Nevada. More specific  
465 results for geographic, environmental, social and genetic patterns will be elucidated as the study  
466 proceeds. The intent here was to highlight both the process and aggregate results of the  
467 participants as compared to the population from which that sample was obtained.

468

#### 469 Declarations

#### 470 Ethics approval

471 This study was approved by the University of Nevada, Reno Institutional Review Board (956068-  
472 8). Each participant provided written, informed consent.

#### 473 Consent for publication

474 Not applicable.

#### 475 Availability of data and materials

476 De-identified participant demographic data and SNP frequencies used for the cardiac risk score  
477 calculations are available from the corresponding author on reasonable request.

#### 478 Competing interests

479 The authors declare that they have no competing interests.

#### 480 Funding

481 Funding was provided by the Nevada Governor's Office of Economic Development (GOED) for  
482 data gathering, analysis and compute infrastructure. Funding was provided by the Renown  
483 Health Foundation for genetic testing and research coordinator support.

#### 484 Authors' contributions

485 JG, CG and TS conceived of the study. MH, JG, JM, BL made substantial contributions to design.  
486 JM, BL, HR, SR, RR made substantial contributions to data analysis. JG, JM, CR, CG, MC, TS made  
487 substantial contributions to interpretation of data. JG, JM, CR, CG, MC, TS made substantial  
488 contributions drafting the manuscript. All authors made substantial contributions analyzing  
489 data and revising the manuscript.

#### 490 Acknowledgements

491 The authors wish to thank all of the people in the Renown Office of Research and Education  
492 who contributed to making this study a success. We thank the countless volunteers and guides.  
493 We thank the Renown IT staff and the DRI IT staff for support. We thank 23andMe and  
494 especially the 23andMe GSR team for help during the study recruitment.

495 **References**

- 496 1. Huber M, Knottnerus JA, Green L, van der Horst H, Jadad AR, Kromhout D, et al. How should  
497 we define health? *BMJ*. 2011;343:d4163–3.
- 498 2. United Health Foundation. America's Health Rankings 2016.
- 499 3. Cuckler G, Martin A, Whittle L, Heffler S, Sisko A, Lassman D, et al. Health spending by state  
500 of residence, 1991-2009. *Medicare Medicaid Res Rev*. 2011;1:E1–E31.
- 501 4. Washoe County Community Health Needs Assessment 2015-17.
- 502 5. Appointment Plus [Internet]. Available from: <https://www.appointment-plus.com/>
- 503 6. Khera AV, Emdin CA, Drake I, Natarajan P, Bick AG, Cook NR, et al. Genetic Risk, Adherence to  
504 a Healthy Lifestyle, and Coronary Disease. *N Engl J Med*. 2016;375:2349–58.
- 505 7. Das S, Forer L, Schönherr S, Sidore C, Locke AE, Kwong A, et al. Next-generation genotype  
506 imputation service and methods. *Nat Genet. Nature Research*; 2016;48:1284–7.
- 507 8. Loh P-R, Palamara PF, Price AL. Fast and accurate long-range phasing in a UK Biobank cohort.  
508 *Nat Genet. Nature Research*; 2016;48:811–6.
- 509 9. Deng JE, Sham PC, Li MX. SNPTracker: A Swift Tool for Comprehensive Tracking and Unifying  
510 dbSNP rs IDs and Genomic Coordinates of Massive Sequence Variants. *G3: Genes| Genomes|*  
511 *Genetics*. 2016.
- 512 10. Bureau UC. Census.gov. Available from: <https://www.census.gov/>
- 513 11. Hedt BL, Pagano M. Health indicators: Eliminating bias from convenience sampling  
514 estimators. *Statistics in Medicine*. John Wiley & Sons, Ltd; 2011;30:560–8.
- 515 12. Rosenthal R, Rosnow RL. *Artifacts in Behavioral Research*. Oxford University Press; 2009.
- 516 13. Junghans C, Jones M. Consent bias in research: how to avoid it. *Heart*. 2007.
- 517 14. Jordan S, Watkins A, Storey M, Allen SJ, Brooks CJ, Garaiova I, et al. Volunteer Bias in  
518 Recruitment, Retention, and Blood Sample Donation in a Randomised Controlled Trial Involving  
519 Mothers and Their Children at Six Months and Two Years: A Longitudinal Analysis. Hills RK,  
520 editor. *PLoS ONE*. Public Library of Science; 2013;8:e67912.
- 521 15. Hyde CL, Nagle MW, Tian C, Chen X, Paciga SA, Wendland JR, et al. Identification of 15  
522 genetic loci associated with risk of major depression in individuals of European descent. *Nat*  
523 *Genet. Nature Research*; 2016;48:1031–6.
- 524 16. Lloyd-Jones DM, Hong Y, Labarthe D, Mozaffarian D, Appel LJ, Van Horn L, et al. Defining  
525 and Setting National Goals for Cardiovascular Health Promotion and Disease Reduction.

- 526 Circulation. American Heart Association, Inc; 2010;121:586–613.
- 527 17. Investigators A. The Atherosclerosis Risk in Communities (ARIC) study: design and  
528 objectives. American Journal of Epidemiology. 1989;129:687–702.
- 529 18. Berglund G, Elmståhl S, Janzon L, Larsson SA. The Malmo Diet and Cancer Study. Design and  
530 feasibility. Journal of Internal Medicine. Blackwell Publishing Ltd; 1993;233:45–51.
- 531 19. Baber U, Mehran R, Sartori S, Schoos MM, Sillesen H, Muntendam P, et al. Prevalence,  
532 impact, and predictive value of detecting subclinical coronary and carotid atherosclerosis in  
533 asymptomatic adults: the BioImage study. J. Am. Coll. Cardiol. 2015;65:1065–74.
- 534 20. Ridker PM, Chasman DI, Zee RYL, Parker A, Rose L, Cook NR, et al. Rationale, design, and  
535 methodology of the Women's Genome Health Study: a genome-wide association study of more  
536 than 25,000 initially healthy american women. Clin. Chem. 2008;54:249–55.

537

### 538 **Figure Legends**

539

540 Figure 1. Demographic map of the Reno/Sparks metropolitan area indicating per cent of  
541 households in zip code blocks below the poverty level.

542

543 Figure 2. Distribution of cardiac risk scores among the participants in the study. The scores are  
544 calculated as in Khera et al. [6] and is described in the text. Risk score means from other studies  
545 are indicated [17-20].

546

**Table 1.** 2015 Census estimate racial and ethnicity data for Northern Nevada, Washoe County, Nevada and the U.S.

|                           | <b>United States</b> | <b>Nevada</b> | <b>Northern Nevada</b> | <b>Washoe County</b> |
|---------------------------|----------------------|---------------|------------------------|----------------------|
| <b>White</b>              | 77.10%               | 75.70%        | 86.70%                 | 85.10%               |
| <b>Black</b>              | 13.30%               | 9.30%         | 2.20%                  | 2.60%                |
| <b>Native American</b>    | 1.20%                | 1.60%         | 2.90%                  | 2.20%                |
| <b>Asian</b>              | 5.60%                | 8.50%         | 4.40%                  | 6.00%                |
| <b>Pacific Islander</b>   | 0.20%                | 0.80%         | 0.50%                  | 0.70%                |
| <b>Other</b>              | 2.60%                | 4.10%         | 3.30%                  | 3.50%                |
| <b>Hispanic or Latino</b> | 17.60%               | 28.10%        | 22.10%                 | 23.90%               |

U.S. Census Bureau, Population Estimates Program (PEP), Vintage 2015, Accessed 16 May 2017  
<https://www.census.gov/quickfacts>.

**Table 2.** Self-reported ethnicity data for study participants and all Renown patients

|                           | <b>Study Participants</b> |                    | <b>All Renown Participants</b> |                    |
|---------------------------|---------------------------|--------------------|--------------------------------|--------------------|
|                           | <b>Count</b>              | <b>% of Cohort</b> | <b>Count</b>                   | <b>% of Cohort</b> |
| <b>White</b>              | 6515                      | 88.86%             | 986645                         | 73.98%             |
| <b>Black</b>              | 91                        | 1.24%              | 39190                          | 2.94%              |
| <b>Native American</b>    | 43                        | 0.59%              | 15219                          | 1.14%              |
| <b>Asian</b>              | 155                       | 2.11%              | 30786                          | 2.31%              |
| <b>Pacific Islander</b>   | 15                        | 0.20%              | 2969                           | 0.22%              |
| <b>Other</b>              | 143                       | 1.95%              | 44311                          | 3.32%              |
| <b>Missing data</b>       | 134                       | 1.83%              | 78515                          | 5.89%              |
| <b>Hispanic or Latino</b> | 236                       | 3.22%              | 136086                         | 10.20%             |

**Table 3.** Location of residence of the study participants.

|                                  | <b>Study Participants</b> |                    | <b>All Renown Patients</b> |                    |
|----------------------------------|---------------------------|--------------------|----------------------------|--------------------|
|                                  | <b>Count</b>              | <b>% of Cohort</b> | <b>Count</b>               | <b>% of Cohort</b> |
| <b>Reno/Sparks</b>               | 6418                      | 83.18%             | 703656                     | 50.52%             |
| <b>All other Washoe County</b>   | 104                       | 1.35%              | 19319                      | 1.39%              |
| <b>All other Northern Nevada</b> | 1052                      | 13.63%             | 229877                     | 16.50%             |
| <b>All other</b>                 | 142                       | 1.84%              | 440005                     | 31.59%             |

**Table 4.** 2015 American Community Survey age for Northern Nevada, Washoe County, Nevada and the U.S.

| <b>Age</b>               | <b>United States</b> | <b>Nevada</b> | <b>Northern Nevada</b> | <b>Washoe County</b> |
|--------------------------|----------------------|---------------|------------------------|----------------------|
| <b>Under 5 years</b>     | 6.30%                | 6.40%         | 5.90%                  | 6.20%                |
| <b>5 to 9 years</b>      | 6.50%                | 6.80%         | 6.50%                  | 6.30%                |
| <b>10 to 14 years</b>    | 6.50%                | 6.50%         | 6.20%                  | 6.40%                |
| <b>15 to 19 years</b>    | 6.70%                | 6.30%         | 6.00%                  | 6.30%                |
| <b>20 to 24 years</b>    | 7.10%                | 6.70%         | 6.60%                  | 7.40%                |
| <b>25 to 34 years</b>    | 13.50%               | 14.30%        | 13.20%                 | 14.10%               |
| <b>35 to 44 years</b>    | 12.80%               | 13.70%        | 12.00%                 | 12.50%               |
| <b>45 to 54 years</b>    | 13.90%               | 13.60%        | 13.70%                 | 13.70%               |
| <b>55 to 59 years</b>    | 6.60%                | 6.30%         | 7.10%                  | 6.80%                |
| <b>60 to 64 years</b>    | 5.80%                | 5.80%         | 6.80%                  | 6.40%                |
| <b>65 to 74 years</b>    | 7.90%                | 8.40%         | 10.30%                 | 8.70%                |
| <b>75 to 84 years</b>    | 4.30%                | 3.90%         | 4.30%                  | 3.70%                |
| <b>85 years and over</b> | 1.90%                | 1.30%         | 1.50%                  | 1.50%                |

U.S. Census Bureau, 2011-2015 American Community Survey 5-Year Estimates. Accessed 16 May 2017 <<http://factfinder2.census.gov>>.

**Table 5.** Age data for study participants and all Renown Patients

|              | <b>Study Participants</b> |                    | <b>All Renown Patients</b> |                    |
|--------------|---------------------------|--------------------|----------------------------|--------------------|
|              | <b>Count</b>              | <b>% of Cohort</b> | <b>Count</b>               | <b>% of Cohort</b> |
| <18 years    | 0                         | 0.00%              | 143451                     | 10.30%             |
| 18-30 years  | 1052                      | 13.63%             | 206333                     | 14.81%             |
| 31-40 years  | 1546                      | 20.04%             | 163433                     | 11.73%             |
| 41-50 years  | 1308                      | 16.95%             | 172804                     | 12.41%             |
| 51-60 years  | 1476                      | 19.13%             | 181403                     | 13.02%             |
| 61-70 years  | 1533                      | 19.87%             | 205401                     | 14.75%             |
| 71-80 years  | 698                       | 9.05%              | 190203                     | 13.66%             |
| >80 years    | 103                       | 1.33%              | 129829                     | 9.32%              |
| Missing Data | 0                         | 0.00%              | 0                          | 0.00%              |

**Table 6.** American community survey (2010-4) study of income / poverty level for Northern Nevada, Washoe County, Nevada and the U.S.

|                                                | United States | Nevada   | Northern NV | Washoe County |
|------------------------------------------------|---------------|----------|-------------|---------------|
| <b>Median Household Income</b>                 | \$53,889      | \$51,847 | \$54,150    | \$52,870      |
| <b>Households Below Poverty Level</b>          | 5.34%         | 4.97%    | 5.05%       | 5.38%         |
| <b>Individuals Age 25+ Below Poverty Level</b> | 12.01%        | 12.17%   | 11.27%      | 11.89%        |

**Table 7.** Sex of study participants and all Renown patients.

|                     | Study Participants |             | All Renown Patients |             |
|---------------------|--------------------|-------------|---------------------|-------------|
|                     | Count              | % of Cohort | Count               | % of Cohort |
| <b>Female</b>       | 5140               | 66.59%      | 685155              | 49.18%      |
| <b>Male</b>         | 2571               | 33.31%      | 706272              | 50.70%      |
| <b>Unknown</b>      | 3                  | 0.04%       | 250                 | 0.02%       |
| <b>Missing data</b> | 5                  | 0.06%       | 1420                | 0.10%       |

**Figure 1.**

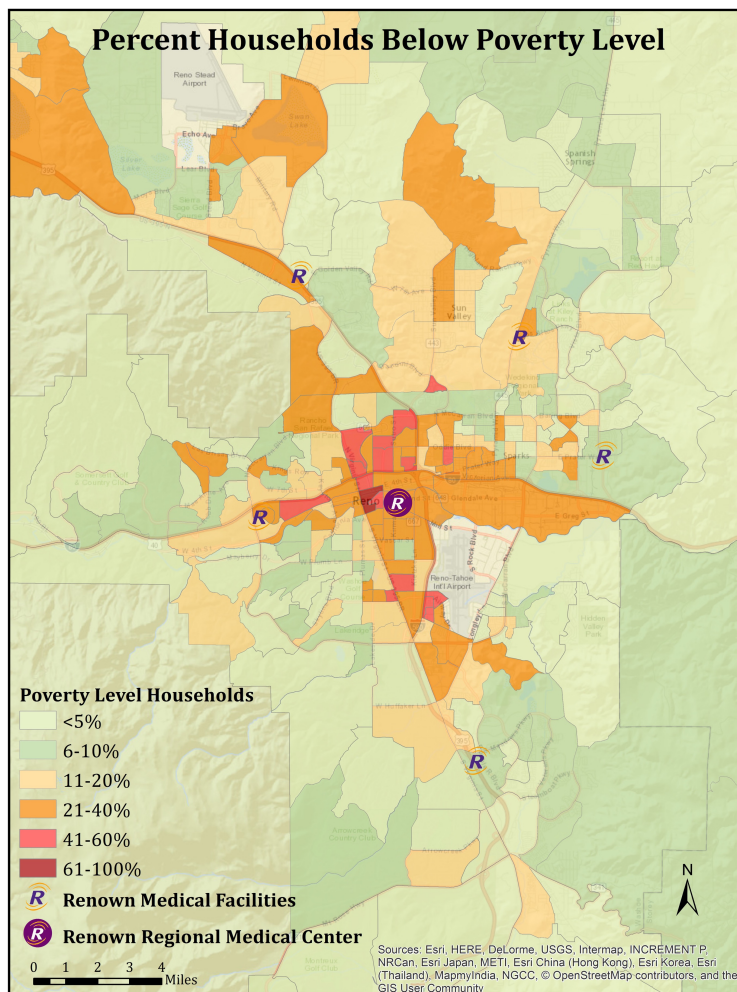

**Figure 2.**

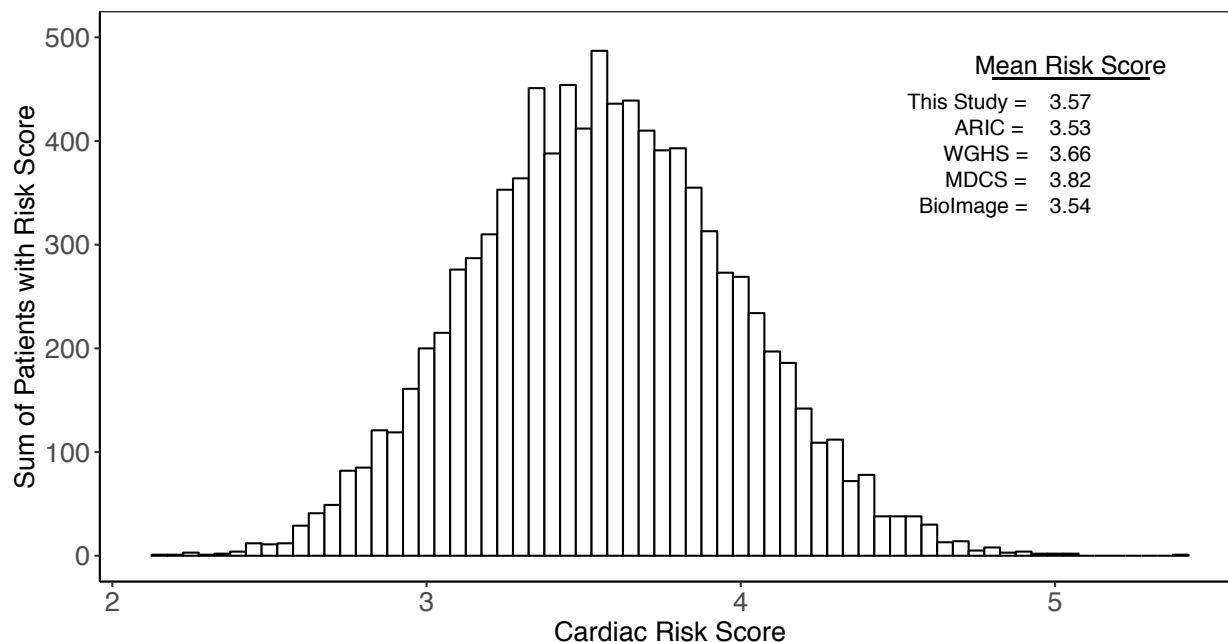

**Supplemental Table 1.** Location of residence of the study participants.

|                                  | <b>Study Participants</b> |                    | <b>All Renown Patients</b> |                    |
|----------------------------------|---------------------------|--------------------|----------------------------|--------------------|
|                                  | <b>Count</b>              | <b>% of Cohort</b> | <b>Count</b>               | <b>% of Cohort</b> |
| <b>Reno/Sparks</b>               | 6418                      | 83.18%             | 703656                     | 50.52%             |
| <b>All other Washoe County</b>   | 104                       | 1.35%              | 19319                      | 1.39%              |
| <b>All other Northern Nevada</b> | 1052                      | 13.63%             | 229877                     | 16.50%             |
| <b>All other</b>                 | 142                       | 1.84%              | 440005                     | 31.59%             |

**Supplemental Table 2.** 2015 American Community Survey age for Northern Nevada, Washoe County, Nevada and the U.S.

| <b>Age</b>            | <b>United States</b> | <b>Nevada</b> | <b>Northern Nevada</b> | <b>Washoe County</b> |
|-----------------------|----------------------|---------------|------------------------|----------------------|
| <b>Under 5 years</b>  | 6.30%                | 6.40%         | 5.90%                  | 6.20%                |
| <b>5 to 9 years</b>   | 6.50%                | 6.80%         | 6.50%                  | 6.30%                |
| <b>10 to 14 years</b> | 6.50%                | 6.50%         | 6.20%                  | 6.40%                |
| <b>15 to 19 years</b> | 6.70%                | 6.30%         | 6.00%                  | 6.30%                |
| <b>20 to 24 years</b> | 7.10%                | 6.70%         | 6.60%                  | 7.40%                |
| <b>25 to 34 years</b> | 13.50%               | 14.30%        | 13.20%                 | 14.10%               |
| <b>35 to 44 years</b> | 12.80%               | 13.70%        | 12.00%                 | 12.50%               |
| <b>45 to 54 years</b> | 13.90%               | 13.60%        | 13.70%                 | 13.70%               |
| <b>55 to 59 years</b> | 6.60%                | 6.30%         | 7.10%                  | 6.80%                |

|                          |       |       |        |       |
|--------------------------|-------|-------|--------|-------|
| <b>60 to 64 years</b>    | 5.80% | 5.80% | 6.80%  | 6.40% |
| <b>65 to 74 years</b>    | 7.90% | 8.40% | 10.30% | 8.70% |
| <b>75 to 84 years</b>    | 4.30% | 3.90% | 4.30%  | 3.70% |
| <b>85 years and over</b> | 1.90% | 1.30% | 1.50%  | 1.50% |

U.S. Census Bureau, 2011-2015 American Community Survey 5-Year Estimates. Accessed 16 May 2017  
<<http://factfinder2.census.gov>>.

**Supplemental Table 3.** Age data for study participants and all Renown Patients

|              | <b>Study Participants</b> |                    | <b>All Renown Patients</b> |                    |
|--------------|---------------------------|--------------------|----------------------------|--------------------|
|              | <b>Count</b>              | <b>% of Cohort</b> | <b>Count</b>               | <b>% of Cohort</b> |
| <18 years    | 0                         | 0.00%              | 143451                     | 10.30%             |
| 18-30 years  | 1052                      | 13.63%             | 206333                     | 14.81%             |
| 31-40 years  | 1546                      | 20.04%             | 163433                     | 11.73%             |
| 41-50 years  | 1308                      | 16.95%             | 172804                     | 12.41%             |
| 51-60 years  | 1476                      | 19.13%             | 181403                     | 13.02%             |
| 61-70 years  | 1533                      | 19.87%             | 205401                     | 14.75%             |
| 71-80 years  | 698                       | 9.05%              | 190203                     | 13.66%             |
| >80 years    | 103                       | 1.33%              | 129829                     | 9.32%              |
| Missing Data | 0                         | 0.00%              | 0                          | 0.00%              |

**Supplemental Table 4.** American community survey (2010-4) study of income / poverty level for Northern Nevada, Washoe County, Nevada and the U.S.

|                                                | <b>United States</b> | <b>Nevada</b> | <b>Northern NV</b> | <b>Washoe County</b> |
|------------------------------------------------|----------------------|---------------|--------------------|----------------------|
| <b>Median Household Income</b>                 | \$53,889             | \$51,847      | \$54,150           | \$52,870             |
| <b>Households Below Poverty Level</b>          | 5.34%                | 4.97%         | 5.05%              | 5.38%                |
| <b>Individuals Age 25+ Below Poverty Level</b> | 12.01%               | 12.17%        | 11.27%             | 11.89%               |

**Supplemental Table 5.** Sex of study participants and all Renown patients.

|                     | <b>Study Participants</b> |                    | <b>All Renown Patients</b> |                    |
|---------------------|---------------------------|--------------------|----------------------------|--------------------|
|                     | <b>Count</b>              | <b>% of Cohort</b> | <b>Count</b>               | <b>% of Cohort</b> |
| <b>Female</b>       | 5140                      | 66.59%             | 685155                     | 49.18%             |
| <b>Male</b>         | 2571                      | 33.31%             | 706272                     | 50.70%             |
| <b>Unknown</b>      | 3                         | 0.04%              | 250                        | 0.02%              |
| <b>Missing data</b> | 5                         | 0.06%              | 1420                       | 0.10%              |
